# Supplementary material for: Prediction of two-dimensional Dirac materials with intrinsic magnetism, quantum anomalous Hall effect and high Curie temperature
Source: Royal Society of Chemistry journal article supplement (doi:10.1039/d4tc00820k), 2024-01-01
Supplement: d4tc00820k1.pdf [file d4tc00820k1.pdf]

## Prediction of two-dimensional Dirac materials with intrinsic magnetism, quantum anomalous Hall effect and high Curie temperature

Xuming Wu,<sup>1,2</sup> Chunhua Tian,<sup>1</sup> Lanhua Zhong,<sup>1</sup> Jun Quan,<sup>1</sup> Jie Yang,<sup>1</sup> Zhibin Shao<sup>\*4</sup> and Guoying Gao<sup>\*2,3</sup>

<sup>1</sup> College of Physics Science and Technology, Lingnan Normal University, 524048 Zhanjiang, China

<sup>2</sup> School of Physics, Huazhong University of Science and Technology, Wuhan 430074, China

<sup>3</sup> Wuhan National High Magnetic Field Center, Huazhong University of Science and Technology, Wuhan 430074, China

<sup>4</sup> Physics Laboratory, Industrial Training Center, Shenzhen Polytechnic University, Shenzhen 518055, China

\*Corresponding authors. E-mail: guoying\_gao@mail.hust.edu.cn, zhibin\_shao@szpt.edu.cn

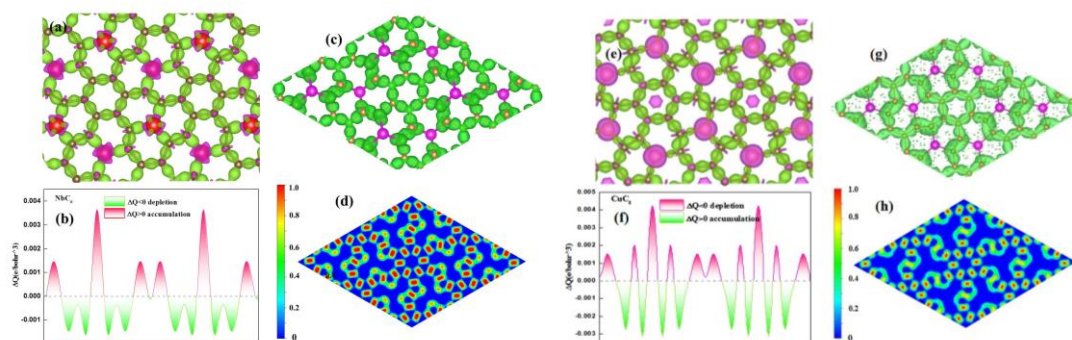

**Fig. S1** Charge density difference of monolayer NbC<sub>6</sub> (a) and CuC<sub>6</sub> (e). The line projection (b,f), pink map ( $\Delta Q > 0$ ) is shown in order to show the electron accumulation region and cyan map ( $\Delta Q < 0$ ) represents the electron depletion region. The ELF (c,g) of NbC<sub>6</sub> and CuC<sub>6</sub> monolayers with an isovalue of 0.0135 and 0.25 e/bohr<sup>3</sup>, respectively. ELF maps sliced perpendicular to the (001) direction (d,h). The red and blue colors refer to the highest (1.0) and lowest value (0) of ELF, respectively.

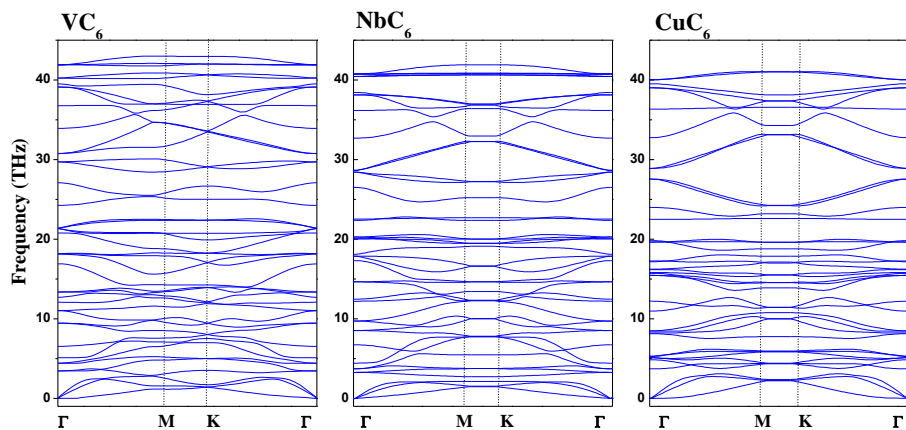

**Fig. S2** The calculated phonon spectrum of the VC<sub>6</sub>, NbC<sub>6</sub> and CuC<sub>6</sub> monolayers, respectively.

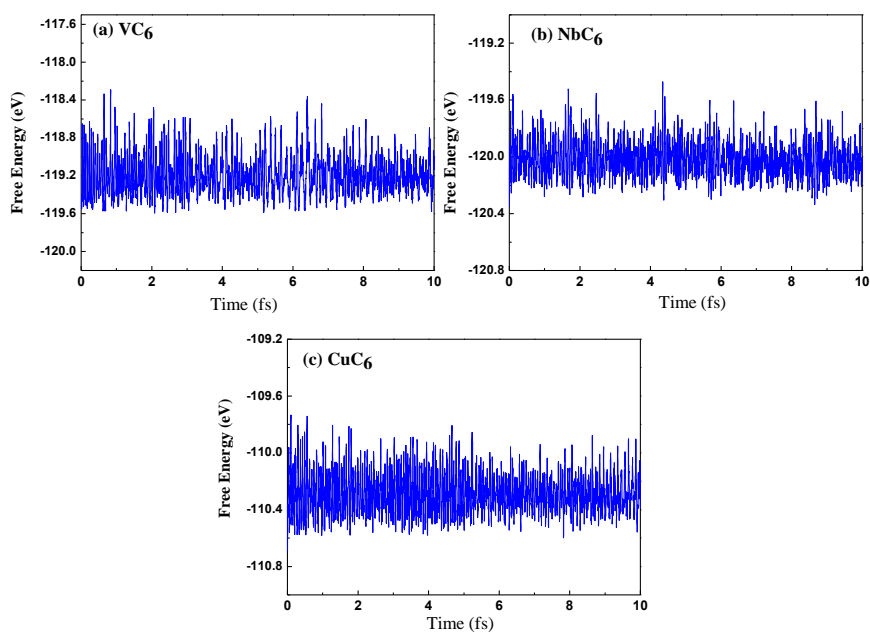

**Fig. S3** Fluctuation of total potential energy of VC<sub>6</sub> (a), NbC<sub>6</sub> (b) and CuC<sub>6</sub> (c) monolayers during the AIMD simulations at 300 K.

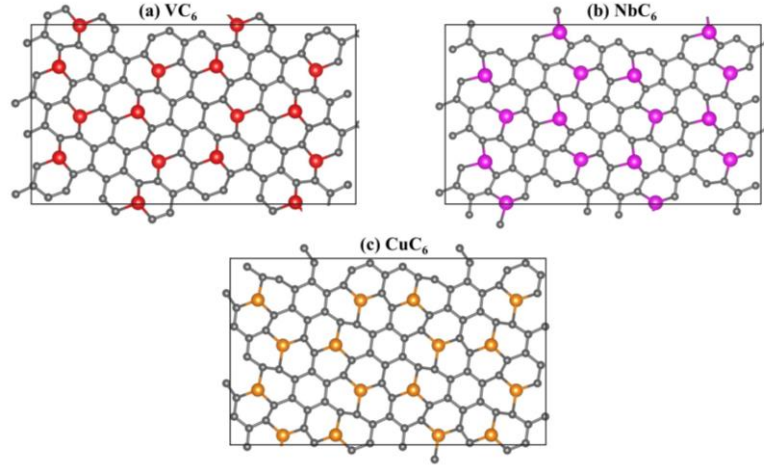

**Fig. S4** the structures of  $VC_6$ ,  $NbC_6$  and  $CuC_6$  monolayers after the simulations for 10 ps at 300 K.

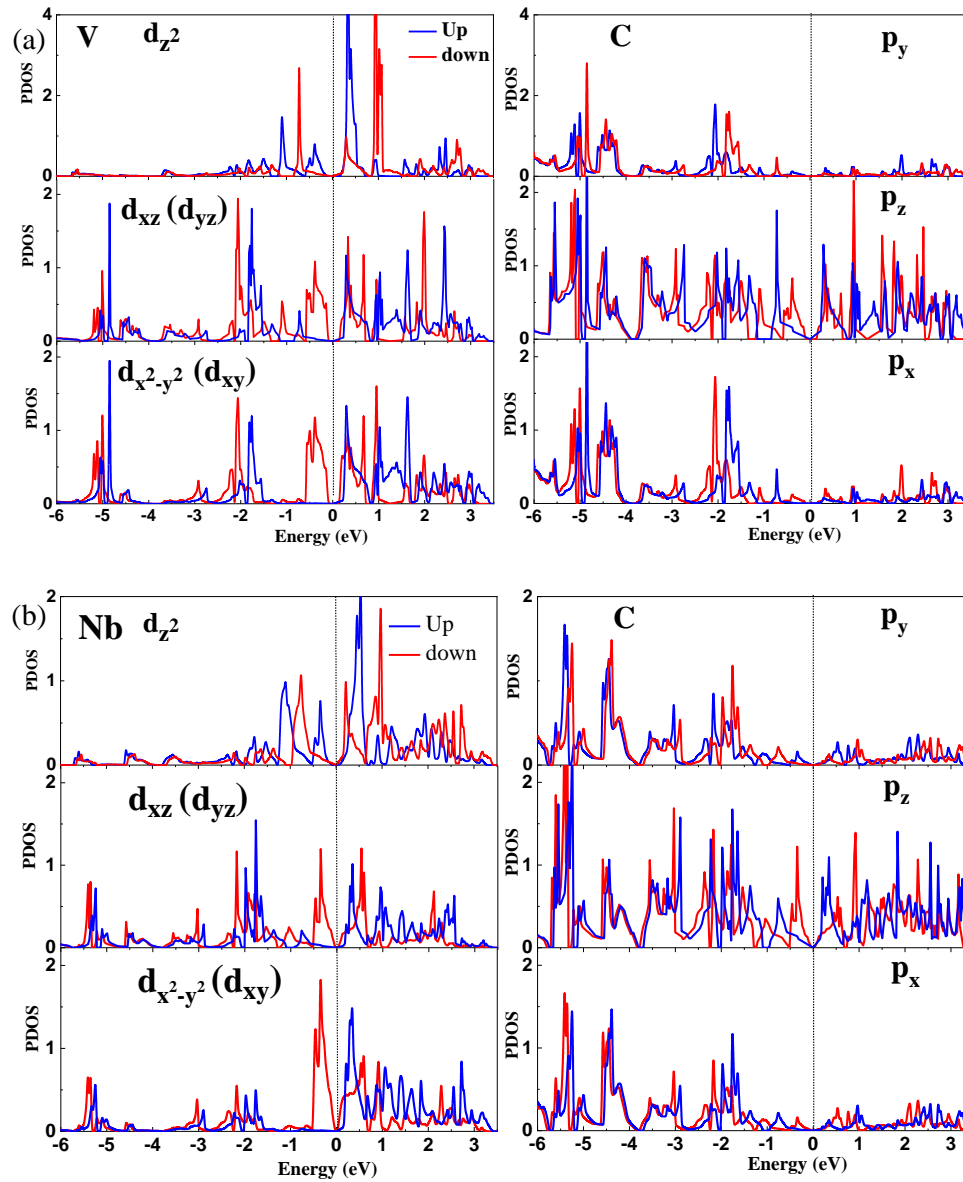

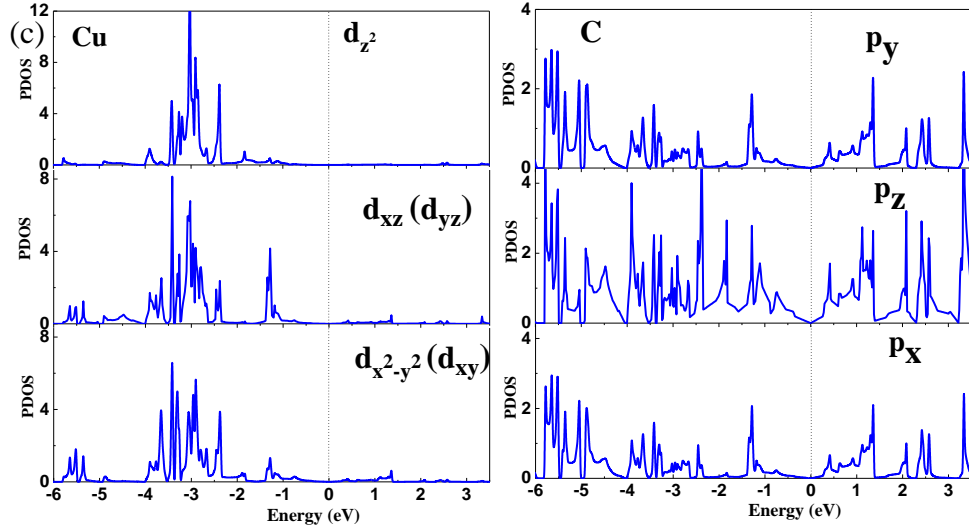

**Fig. S5** The orbit-resolved partial densities of states of V, Nb, Cu and C atoms in monolayer VC<sub>6</sub>, NbC<sub>6</sub> and CuC<sub>6</sub>, respectively. The red (green) line represents the spin-up (spin-down) channel of the VC<sub>6</sub> and NbC<sub>6</sub> monolayers. The Fermi level is set at zero.

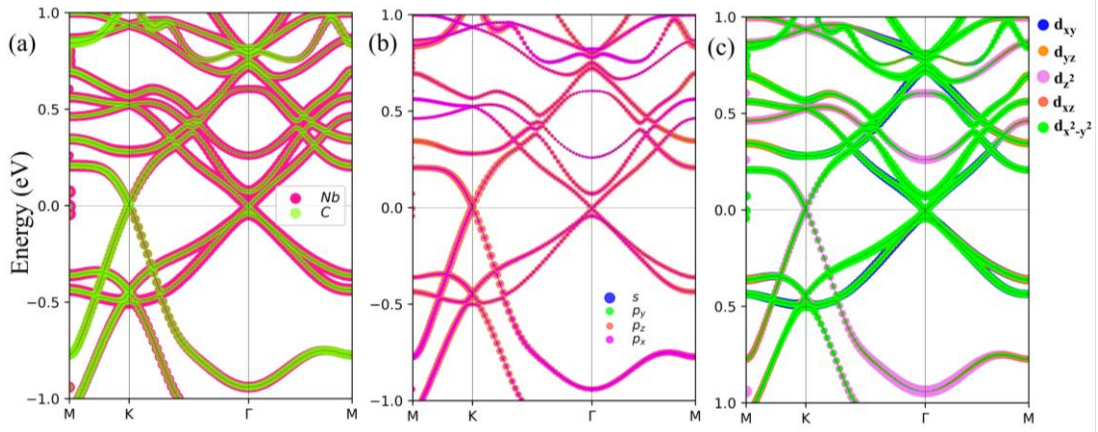

**Fig. S6** Energy and  $k$  contribution of atom-resolved (a), C- $s/p$  resolved (b), and Nb- $d$  resolved (c) for NbC<sub>6</sub> monolayer with PBE+SOC. The color intensity denotes the amplitude of the atom and orbital-resolved character.

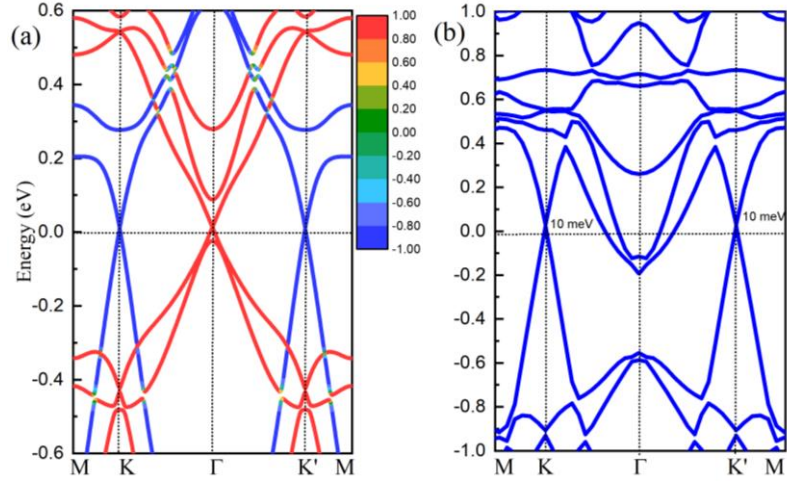

**Fig. S7** The spin-resolved band structure at the GGA+SOC level (a) and the band structure at the HSE+SOC level for the NbC<sub>6</sub> monolayer (b).

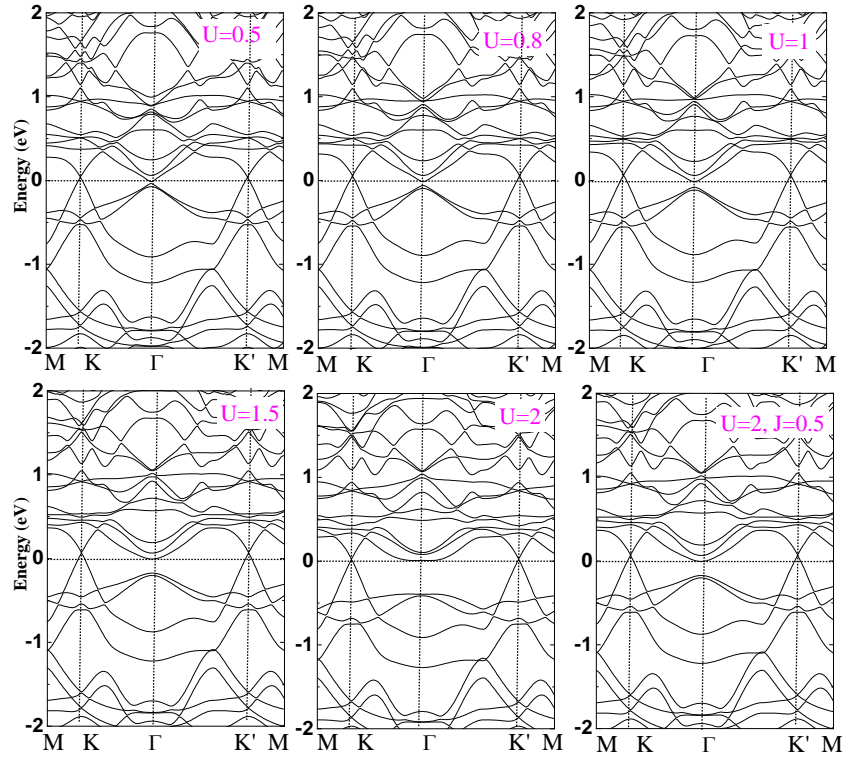

**Fig. S8** Electronic band structure of NbC<sub>6</sub> monolayer calculated by PBE+SOC+U with different U values.

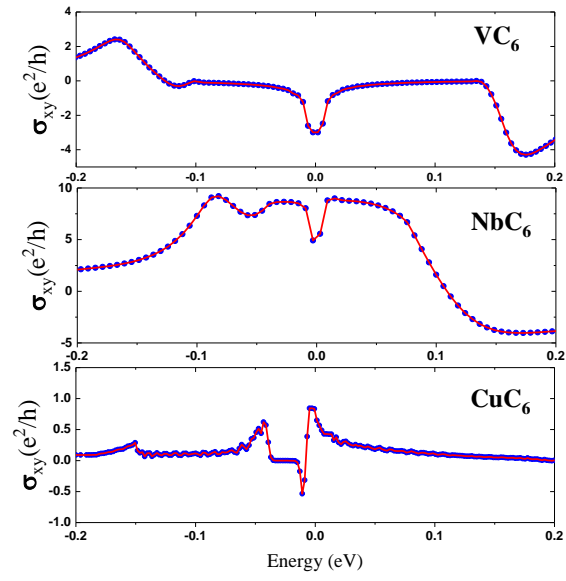

**Fig. S9** The anomalous Hall conductance of  $VC_6$ ,  $NbC_6$  and  $VC_6$  monolayers.
